# Supplementary material for: Effector target-guided engineering of an integrated domain expands the disease resistance profile of a rice NLR immune receptor
Source: eLife journal article supplement (doi:10.7554/elife.81123), 2023-04-19
Supplement: fig4-data1 [file Figure 4Source data 1.xlsx]

## Sheet: Sheet1
	M.oryzae Sasa2 +
T1 line name	AVR-Pii	AVR-PikC	AVR-PikD	AVR-PikF
Nipponbare WT (Pikp-) #2	12.129	13.08	12.326	10.417
Pikp-1/Pikp-2 transgenic NP line #1	13.0939	9.72706	1.47913	5.3601
Pikp-1/Pikp-2 transgenic NP line #2	13.5094	7.14915	1.52139	8.65645
Pikp-1/Pikp-2 transgenic NP line #3	9.49463	12.7628	0.957915	9.26219
Pikp-1/Pikp-2 transgenic NP line #4	9.76933	9.13541	2.14122	7.98732
Pikp-1/Pikp-2 transgenic NP line #5	9.16359	11.3612	1.76792	10.5512
Pikp-1/Pikp-2 transgenic NP line #6	12.1712	11.8683	1.53548	12.3684	(mm2)
T1 from Pikp-1OsHIPP19-mbl7/Pikp-2 transgenic NP line 1 (T0)
	M.oryzae Sasa2 +
T1 line name	AVR-Pii	AVR-PikC	AVR-PikD	AVR-PikF
#1	9.45941	1.17626	1.14809	1.134
#2	8.46628	0.936785	1.04948	1.134
#3	8.29019	0.619828	0.781828	1.2467
#4	11.826	1.16922	1.28192	0.922698
#5	8.72689	0.859306	1.16922	1.27487
#6	8.92411	0.986089	1.27487	1.23966	(mm2)
T1 from line 2 (T0)
	M.oryzae Sasa2 +
T1 line name	AVR-Pii	AVR-PikC	AVR-PikD	AVR-PikF
#1	12.8192	1.06357	1.52139	1.35235
#2	9.10019	1.2467	1.23966	0.873393
#3	11.7485	1.09878	1.06357	0.964958
#4	14.2279	0.964958	1.0847	1.2467
#5	8.32541	0.957915	0.788871	1.02835	(mm2)
T1 from line 3 (T0)
	M.oryzae Sasa2 +
T1 line name	AVR-Pii	AVR-PikC	AVR-PikD	AVR-PikF
#1	10.7132	1.06357	1.21148	1.33826
#2	9.67776	0.964958	0.88748	1.16922
#3	10.2694	1.31009	1.09878	1.35235
#4	10.044	1.02835	0.88748	1.02835
#5	12.467	0.964958	0.873393	0.964958
#6	9.32559	1.03539	0.986089	0.964958	(mm2)
T1 from line 4 (T0)
	M.oryzae Sasa2 +
T1 line name	AVR-Pii	AVR-PikC	AVR-PikD	AVR-PikF
#1	11.9105	1.06357	1.2467	1.16922
#2	12.0796	1.35235	1.52139	1.06357
#3	11.5513	1.54957	1.01426	0.957915
#4	11.6711	1.23966	1.09878	1.09878
#5	7.88871	0.873393	1.01426	1.02835
#6	10.037	0.88748	1.03539	1.04244	(mm2)
T1 from line 5 (T0)
	M.oryzae Sasa2 +
T1 line name	AVR-Pii	AVR-PikC	AVR-PikD	AVR-PikF
#1	13.5094	1.02835	1.58479	1.23966
#2	14.3265	1.02835	0.788871	1.02835
#3	13.5024	0.873393	1.02835	0.873393
#4	16.841	0.788871	0.732524	1.02835	(mm2)
T1 from line 6 (T0)
	M.oryzae Sasa2 +
T1 line name	AVR-Pii	AVR-PikC	AVR-PikD	AVR-PikF
#1	6.62088	0.964958	0.964958	1.16922
#2	6.53636	1.09878	0.957915	1.16922
#3	3.93731	1.02835	0.964958	1.46505
#4	7.00828	1.06357	0.873393	0.957915
#5	7.69854	1.2467	0.957915	1.2467
#6	10.4385	0.732524	0.788871	0.788871	(mm2)
T1 from Pikp-1SNK/EKE/Pikp-2 transgenic NP line 1 (T0)
	M.oryzae Sasa2 +
T1 line name	AVR-Pii	AVR-PikC	AVR-PikD	AVR-PikF
#1	10.8822	1.46505	0.873393	1.16922
#2	10.1778	1.60592	1.33826	1.52139
#3	10.2553	1.16922	1.2467	1.09878
#4	7.78306	1.46505	1.02835	1.46505
#5	8.18454	1.458	1.04244	1.46505
#6	8.20567	1.52139	1.52139	1.23966	(mm2)
T1 from line 2 (T0)
	M.oryzae Sasa2 +
T1 line name	AVR-Pii	AVR-PikC	AVR-PikD	AVR-PikF
#1	6.45184	1.04244	1.06357	1.06357
#2	9.19176	1.02835	1.4087	1.06357
#3	11.5372	1.35235	1.16922	1.52139
#4	11.3964	1.458	0.957915	1.52139
#5	7.83941	1.58479	1.2467	1.46505	(mm2)
T1 from line 3 (T0)
	M.oryzae Sasa2 +
T1 line name	AVR-Pii	AVR-PikC	AVR-PikD	AVR-PikF
#1	6.25462	1.46505	0.873393	1.21148
#2	5.81793	1.16922	1.09878	1.2467
#3	10.2765	1.2467	0.873393	1.2467
#4	9.43828	1.16922	0.957915	1.02835
#5	8.3888	1.16922	1.33826	1.23966
#6	8.37471	1.16922	0.986089	1.33826	(mm2)
T1 from line 4 (T0)
	M.oryzae Sasa2 +
T1 line name	AVR-Pii	AVR-PikC	AVR-PikD	AVR-PikF
#1	7.22662	1.52139	1.09878	1.02835
#2	4.93749	1.16922	1.33826	1.2467
#3	7.10688	1.31009	1.05652	1.44392
#4	6.1701	1.52139	1.09878	1.23966
#5	5.30375	1.06357	1.02835	0.788871
#6	5.66297	0.810002	1.02835	1.02835	(mm2)
T1 from line 5 (T0)
	M.oryzae Sasa2 +
T1 line name	AVR-Pii	AVR-PikC	AVR-PikD	AVR-PikF
#1	10.7625	0.88748	1.33826	1.458
#2	6.13488	0.873393	1.01426	1.02131
#3	7.51541	1.83835	0.90861	1.48618
#4	8.0648	1.62705	1.14809	2.00035
#5	8.21976	1.0847	1.22557	0.86635
#6	6.27575	0.986089	0.957915	1.04244	(mm2)
